# Supplementary material for: Targeting MicroRNA-143 Leads to Inhibition of Glioblastoma Tumor Progression
Source: PubMed Central journal article supplement (PMC6210372; doi:10.3390/cancers10100382), 2018-10-12

# Targeting MicroRNA-143 Leads to Inhibition of Glioblastoma Tumor Progression

Eunice L. Lozada-Delgado <sup>1,2,3</sup>, Nilmary Grafals-Ruiz <sup>3,4</sup>, Miguel A. Miranda-Román <sup>1,3</sup>, Yasmarie Santana-Rivera <sup>1,3</sup>, Fatma Valiyeva <sup>3</sup>, Mónica Rivera-Díaz <sup>2,3</sup>, María J. Marcos-Martínez <sup>5,6</sup> and Pablo E. Vivas-Mejía <sup>2,3,\*</sup>

- <sup>1</sup> Department of Biology, Rio Piedras Campus, University of Puerto Rico, San Juan, PR 00931, USA; eunice.lozada@upr.edu (E.L.L.-D.); mirandar.miguel@gmail.com (M.A.M.-R.); yasmarie.santana@upr.edu (Y.S.-R.)
  - <sup>2</sup> Department of Biochemistry, Medical Sciences Campus, University of Puerto Rico, San Juan, PR 00936, USA; mrivera@bromediconllc.com
  - <sup>3</sup> Comprehensive Cancer Center, University of Puerto Rico, San Juan, PR 00935, USA; nilmary.grafals1@upr.edu (N.G.-R.); fvaliyeva@cccpr.org (F.V.)
  - <sup>4</sup> Department of Physiology, Medical Sciences Campus, University of Puerto Rico, San Juan, PR 00936, USA
  - <sup>5</sup> Department of Pathology and Laboratory Medicine, Medical Sciences Campus, University of Puerto Rico, San Juan, PR 00936, USA; maria.marcos@upr.edu
  - <sup>6</sup> Anatomic Pathology Laboratory, Puerto Rico Medical Services Administration, San Juan, PR 00936, USA
- \* Correspondence: pablo.vivas@upr.edu; Tel.: +1-787-772-8300

## Supplementary Material Figure S1. SCL30A8 3'UTR vectors A and B sequences

>HmiT067088a

```
CTAGCTCAGTCACACCGTCAGTTTCCCAAATTTGACAGGCCACCTTCAAACATGCTGCTATGCAGTTTCTGCA
TCATAGAAAATAAGGAACCAAAGGAAGAAATTCATGTCATGGTGAATGCACATTTTATCTATTTATTTAGT
TCCATTACCATGAAGGAAGAGGCACTGAGATCCATCAATCAATTGGATTATATACTGATCAGTAGCTGTGT
TCAATTGCAGGAATGTGTATATAGATTATTCCTGAGTGGAGCCGAAGTAACAGCTGTTTGTAACACTATCGGCA
ATACCAAATTCATCTCCCTTCCAATAATGCATCTTGAGAACACATAGGTAAATTTGAACTCAGGAAAGTCTT
ACTAGAAATCAGTGGAAAGGGACAAATAGTCACAAAATTTTACCAAAACATTAGAAACAAAAAATAAGGAG
AGCCAAGTCAGGAATAAAAAGTGACTCTGTATGCTAACGCCACATTAGAACTTGGTTCTCTACCAAGCTGTA
ATGTGATTTTTTTTTCTACTCTGAATTGGAATATGTATGAATATACAGAGAAGTGCTTACAACATAATTTTTAT
TTACTTGTACATTTTGGCAATAAAATCCCTCTTATTTCTAAATTTCTAACTGTTTATTTCAAAACTTTATATAAT
CACTGTTCAAAAGGAAATATTTTCACCTACCAGAGTGCTTAAACACTGGCACCAGCCAAAGAATGTGGTTGT
AGAGACCCAGAAGTCTTCAAGAACAGCCGACAAAACATTTCGAGTTGACCCACCAAGTTGTTGCCACAGA
TAATTTAGATATTTACCTGCAAGAAGGAATAAAGCAGATGCAACCAATTCATTCAGTCCACGAGCATGATGT
GAGCACTGCTTTGTGCTAGACATTGGGCTTAGCATTGAAACTATAAAGAGGAATCAGACGCAGCAAGTGCTT
CTGTGTTCTGGTAGCAACTCAACACTATCTGTGGAGAGTAAACTGAAGATGTGCAGGCCAACATTCTGGAAA
TCCTATGTCAATGGGTTTGGTTTGGAACTGGACTTCTGCATTTTTAAAAGTTACCCAGAGATGCTTCTAAAG
ATGAGCCATAGTCTAGAAGATTGTCAACCACAGGAGTTCATTGAGTGGGACAGCTAGACACATACATTGGC
AGCTACAATAGTATCATGAATTGCAATGATGTAGTGGGGTATAAAAGGAAAGCGATGGATATTGCCGGATG
GGCATGGCCAGTGATGTTTCACGTCATTGAGGTGACAGCTCTGCTGGACTTTGAATTACATATGGAGGCTCTC
CAGGAAGACGAAGAAGAGAAGGACATTCTAGGCAAAAAGAAGACTAGGCACAAGGCACACTTATGTTTGT
CTGTTAGCTTTTAGTTGAAAAGCAAATACATGATGCAAAGAAACCTCTCCACGCTGTGATTTTTAAAAC
ACATACTTTTTGCAACTTTATGGTTATGAGTATTGTAGAGAACAGGAGATAGGTCTTAGATGATTTTTATGTTG
TTGTCAGACTCTAGCAAGGTAAGAACTAGCAGGCATTAATAATTGTTGAGGCAATGACTCTGAGGCTA
TATCTGGGCCTTGTCAATTATTTATCATTATATTTGTATTTTTTCTGAAATTTGAGGGCCAAGAAAACATTGA
CTTGACTGAGGAGTACATCTGTGCCATCTCTGCAATCAATCAGCACCAGTGAATAACTACTTAGCATT
CTGCTGAGCTTTCCCTGCTCAGTAGAGACAAATATACTCATCCCCACCTCAGTGAGCTTGTGTTAGGCAACCA
GGATTAGAGCTGCTCAGGTTCCCAACGTTCTCCTGCCACATCGGGTCTCAAATGGAAAGAATGGTTTATGC
```

CAAATCACTTTTCTGTCTGAAGGACCACTGAATGGTTTTGTTTTCCATATTTTGCATAGGACGCCCTAAAGA  
CTAGGTGACTTGGCAAACACACAAGTGTTAGTATAATTCTTTGCTTCCTGCTCTTTTTGAAAATCATGTTTGA  
TTGATTTAAGTCAGAAATCACTGAATGTCAGGTAATCATTATGGAGGGAGATTTGTGTGTCAACCAAAGT  
AATTGTCCCATGGCCCCAGGGTATTTCTGTTGTTCCCTGAAATTCTGCTTTTTTAGTCAGCTAGATTGAAAAC  
TCTGAACAGTAGATGTTTATATGGCAAATGCAAGAC

>HmiT067088b

GGCCCCAGGGTATTTCTGTTGTTTCCCTGAAATTCTGCTTTTTTAGTCAGCTAGATTGAAAACCTCTGAACAGTA  
GATGTTTATATGGCAAATGCAAGACAATCTACAAGGGAGATTTAAGGATTTTGAGATGAAAAAACAGAT  
GCTACTCAGGGGCTTTATGAACCATCCATCAATTCTGAAGTTCGACTCTCCATTACCCTTTCCCTGGTGTGG  
TCAGAACTCCAGGTCAGTGAAGTATGTTGGAATCATGTAGTTGAATCTTTACTTCAAGACATTGTATTCTCT  
CCAGCTATCAAAACATTAATGATCTTTTATGCTTTTTTTTGTATTGTTATACTTTAAGTCTGGGGTACATGT  
GCGGAACATGTAGGTTTGTACATAGGTATACATGTGCCATGGTGGTTTGTGCACTCATCAACCTGTCATCT  
ACATTCTTTTATGTCTGCTTTCAAAGCAACACTCTGTTCTTCTGAGTAGTAAATCAGGTCAACTTTACCACC  
AGCCTCCATTTTTAATATGCTTCACCATCATCCAGCACCTACTTAAGATTTATCTAGGGCTCTGTGGTGATGTT  
AGGACCCATAAAAGAAATTTATGCCTTCCATATGTTTGGTTACAGATGGGAAATGGGAATGTTGAAGGACAT  
GAAAGAAAGGATGTTTACACATTAAGCATCAGTCTGAAGCTAGATTGTCTGAGTTTGAATCTTAGCTCTTCC  
CTTTATTAGCTCTGTGACCTCGAGCTAGTACTTAAATGCTCTGATCCTCTATTTCCCTGATCAGTGAAACCTCC  
CTATTCAAATGTGTGAGAGTTTAATAAATTAGGACACTTAAAAATGTTGGAGCAGTGCATAGCATGTAGTGT  
TCAGTACATGTTAAATGTTGTTTTTATTATGTACAAACATGAGTGGGCACAGAATTTTAAATCATCTCAACTT  
TTGAGAAAATTTGAGTTATCAACACCGTCCCAACAAGACAGTGGCAAATTTATTGGTGAGAATTAACAGCT  
GTTTCTCAGAGGAAGCAATGGAGGCTTGTGGGATAAAGGCATTTACTGAGAGGCTGTTACCTAGTGAGAGT  
GATGAATTAATTAATAAATAGTCGAATCCCTTTCTGACTGTCTCTGAAAGCTCCGCTTTTATCTTTGAAGAGCA  
GAATTGCTACTCCAAGGACATTTATTAATAAAAAGAACAACACTGTCCAGTGCAATGAAGGCAAAGTCATAGG  
TCTCCCAAGTCTTACCCCATTCCTGTGAAATATCAAGTCTTGGCTTTTCTCTGTCATGTAGCCTCAACTTTCTC  
TGACCGGGTGCAATTTCTTCTGTTTCTAAATTGCCAGTGGCAAATTTGGATCACTTACTTAATATCTGTTA  
AATTTTGTGACCCAACAAAGTCTTTAGCACTGTGGTGTCAAAAAGAAAAACACCTCCAGGCATATACATT  
TTATAGATTCCTGGAGAATGTGCTCTCCAGCTCCATCCCCACCAATGAAATATGATCCAGAGAGTCTTGCA  
AAGAGACAAGCCTCATTTTCCACAATTAGCTCTAAAGTGCCTCCAGGAAATGATTTTCTCAGCTCATCTCTCT  
GTATTCCCTGTTTGGATCACAGGGCAATCTGTTTAAATGACTAATTACAGAAATCATTAAAGGCACCAAGC  
AAATGTCATCTCTGAATACACACATCCCAAGCTTTACAAATCCTGCCTGGCTTGACAGTGATGAGGCCACTT  
AACAGTCCAGCGCAGGCGGATGTTAAAAAAAATAAAAAGGTGACCATCTGCGGTTTGTATTTTAACTTTCT  
GATTTCACTTAAACGTCTGTCAATCTGTTACTGGGCACCTGTTTAAATTCTATTTTAAATGTTAATGTGTGTT  
GTTTAAATAAAAATCAAGAAAGAGAGAGTTTGGGTTAAGTCATC

Supplementary Material Figure S2: Sequence alignment of miR-143 and SLC30A8 3'UTR

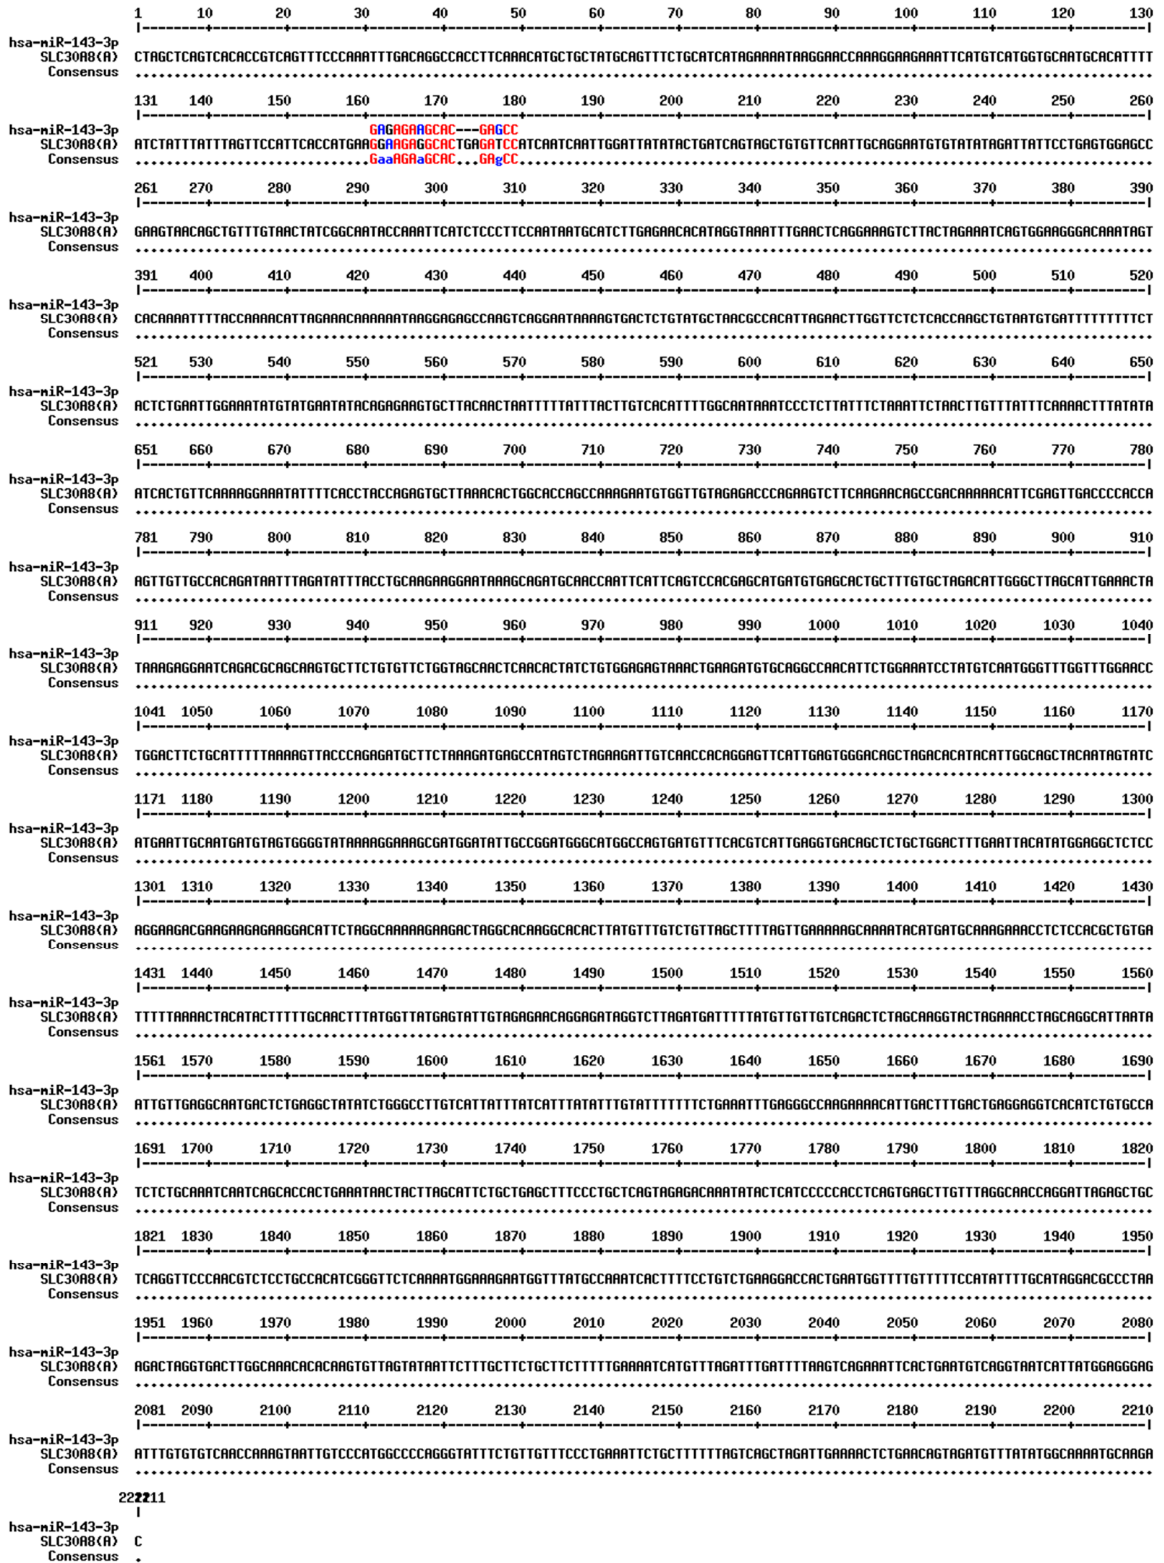

Supplement: cancers-10-00382-s001.pdf [file cancers-10-00382-s001.pdf]
